# Supplementary material for: Real-Time Telerehabilitation in Older Adults With Musculoskeletal Conditions: Systematic Review and Meta-analysis
Source: PubMed Central journal article supplement (PMC9478822; doi:10.2196/36028), 2022-09-01
Supplement: rehab_v9i3e36028_app2.pdf [file rehab_v9i3e36028_app2.pdf]

Table S1

| <b>Author (Year)</b>       | <b>Participants' ICT skills/<br/>experience</b>                          | <b>Supervision by other than<br/>health professionals</b>                                                    | <b>Safety measure</b>                                           | <b>Speed of<br/>internet</b> | <b>Other</b>                                                                                                 |
|----------------------------|--------------------------------------------------------------------------|--------------------------------------------------------------------------------------------------------------|-----------------------------------------------------------------|------------------------------|--------------------------------------------------------------------------------------------------------------|
| An et al, 2021             | Familiarity with smartphone apps                                         | None                                                                                                         | None                                                            | None                         | No vision and hearing problems                                                                               |
| Doricon-Cadrin et al, 2020 | Instructions for use internet-based telecommunication mobile application | None                                                                                                         | None                                                            | High-speed internet          | None                                                                                                         |
| Fernando et al, 2018       | None                                                                     | Caregivers assist the patient                                                                                | Pain and fatigue scores (graduated from 0 to 10)                | None                         | No problems with vision                                                                                      |
| Hong et al, 2017           | None                                                                     | None                                                                                                         | The Rating of Perceived Exertion (RPE)                          | 10 Mbps.                     | The participants were appropriately trained and experienced enough to ensure compliance and safety           |
| Prvu Bettger et al, 2020   | None                                                                     | None                                                                                                         | Patient-reported falls, pain, and hospital readmissions         | None                         | None                                                                                                         |
| Russell et al, 2003        | None                                                                     | None                                                                                                         | None                                                            | 18 kbps.                     | Wireless headphones were used to enable the subject to move about the room during the rehabilitation session |
| Russell et al, 2011        | None                                                                     | None                                                                                                         | None                                                            | 18 kbps.                     | None                                                                                                         |
| Sparrow et al, 2011        | None                                                                     | None                                                                                                         | The Rating of Perceived Exertion (RPE)                          | None                         | None                                                                                                         |
| Tousignant et al, 2011     | None                                                                     | Family member or friend who had received prior training in the use of the technology that had been installed | Someone was to be at the participant home during tele-treatment | 512 kbps.                    | None                                                                                                         |
| Tousignant et al, 2015     | None                                                                     | None                                                                                                         | None                                                            | 512 kbps.                    | The system was mounted over a 20-inch LCD screen                                                             |
